# Supplementary material for: Road traffic injuries in Poland: magnitude and risk factors
Source: Springer Nature journal article supplement (doi:10.1007/s00068-019-01093-6), 2019-02-11
Supplement: MOESM1 [file 16465496]

**Appendix. Table 1. Road crashes, deaths and injuries in Poland, 2004 to 2014 by month.**

| **Month** | **Year** | | | | | | | | | | | |
| --- | --- | --- | --- | --- | --- | --- | --- | --- | --- | --- | --- | --- |
|  | **2004** | **2005** | **2006** | **2007** | **2008** | **2009** | **2010** | **2011** | **2012** | **2013** | **2014** |
| January | Road crashes | 3307 | 3895 | 2528 | 4127 | 3843 | 3032 | 2075 | 2159 | 2562 | 2195 | 2215 |
| Fatalities | 308 | 480 | 252 | 503 | 431 | 341 | 175 | 226 | 262 | 215 | 216 |
| Injuries | 4160 | 4779 | 3150 | 5029 | 4746 | 3913 | 2700 | 2750 | 3173 | 2646 | 2713 |
| February | Road crashes | 3354 | 2804 | 2599 | 2854 | 3126 | 2624 | 2024 | 2318 | 2236 | 1896 | 2163 |
| Fatalities | 326 | 307 | 237 | 307 | 389 | 263 | 160 | 259 | 212 | 176 | 210 |
| Injuries | 4210 | 3668 | 3346 | 3631 | 3824 | 3411 | 2677 | 2888 | 2795 | 2364 | 2628 |
| March | Road crashes | 3405 | 2919 | 2940 | 3579 | 3478 | 2992 | 2680 | 2598 | 2579 | 2168 | 2517 |
| Fatalities | 381 | 297 | 318 | 366 | 408 | 289 | 255 | 257 | 273 | 190 | 217 |
| Injuries | 4113 | 3688 | 3729 | 4495 | 4459 | 3703 | 3357 | 3175 | 3254 | 2746 | 3028 |
| April | Road crashes | 3962 | 3325 | 3522 | 3784 | 3722 | 3607 | 2870 | 3132 | 2702 | 2318 | 2927 |
| Fatalities | 377 | 325 | 366 | 396 | 393 | 339 | 255 | 304 | 253 | 200 | 231 |
| Injuries | 5045 | 4156 | 4564 | 4829 | 4591 | 4556 | 3585 | 3896 | 3326 | 2864 | 3329 |
| May | Road crashes | 4203 | 4274 | 4049 | 4244 | 4256 | 3866 | 3468 | 3763 | 3341 | 3108 | 3023 |
| Fatalities | 427 | 410 | 417 | 402 | 401 | 341 | 292 | 353 | 284 | 288 | 258 |
| Injuries | 5402 | 5555 | 5167 | 5540 | 5509 | 5006 | 4474 | 4741 | 4154 | 3800 | 3725 |
| June | Road crashes | 4547 | 4585 | 4361 | 4288 | 4576 | 3869 | 4040 | 3969 | 3264 | 3375 | 3505 |
| Fatalities | 434 | 461 | 394 | 467 | 421 | 371 | 363 | 397 | 288 | 277 | 275 |
| Injuries | 5985 | 5998 | 5547 | 5742 | 5975 | 4966 | 5078 | 4873 | 4063 | 4185 | 4018 |
| July | Road crashes | 4881 | 4763 | 4576 | 4537 | 4435 | 4227 | 3996 | 3587 | 3585 | 3646 | 3353 |
| Fatalities | 540 | 547 | 514 | 541 | 482 | 477 | 389 | 377 | 309 | 306 | 275 |
| Injuries | 6340 | 6336 | 6070 | 6047 | 5852 | 5634 | 5295 | 4710 | 4627 | 4541 | 4257 |
| August | Road crashes | 5007 | 4592 | 4233 | 4395 | 4534 | 4330 | 4096 | 3877 | 3497 | 3645 | 3250 |
| Fatalities | 596 | 569 | 512 | 509 | 484 | 451 | 470 | 431 | 356 | 372 | 293 |
| Injuries | 6665 | 5964 | 5566 | 5782 | 6110 | 5748 | 5377 | 4827 | 4406 | 4622 | 4131 |
| September | Road crashes | 4600 | 4573 | 4527 | 4517 | 4261 | 4114 | 3925 | 3936 | 3635 | 3590 | 3344 |
| Fatalities | 565 | 538 | 538 | 529 | 458 | 409 | 470 | 395 | 339 | 333 | 312 |
| Injuries | 5838 | 5731 | 5631 | 5796 | 5388 | 5110 | 4886 | 4816 | 4430 | 4426 | 4034 |
| October | Road crashes | 5026 | 4386 | 4588 | 4603 | 4684 | 4326 | 3675 | 3799 | 3733 | 3645 | 3173 |
| Fatalities | 652 | 567 | 568 | 527 | 569 | 481 | 450 | 419 | 379 | 391 | 323 |
| Injuries | 6214 | 5444 | 5656 | 5816 | 5771 | 5261 | 4411 | 4593 | 4474 | 4319 | 3747 |
| November | Road crashes | 4265 | 3847 | 4151 | 4365 | 4047 | 3 729 | 3832 | 3089 | 3071 | 3059 | 2624 |
| Fatalities | 558 | 483 | 512 | 492 | 505 | 427 | 455 | 328 | 356 | 305 | 272 |
| Injuries | 5118 | 4826 | 4919 | 5349 | 4892 | 4505 | 4457 | 3742 | 3639 | 3669 | 3061 |
| December | Road crashes | 4512 | 4137 | 4802 | 4243 | 4092 | 3480 | 2151 | 3838 | 2841 | 3202 | 3276 |
| Fatalities | 548 | 460 | 615 | 544 | 496 | 383 | 173 | 453 | 260 | 304 | 320 |
| Injuries | 5571 | 5046 | 5778 | 5168 | 4980 | 4233 | 2655 | 4490 | 3451 | 3877 | 3874 |
| Total | Road crashes | 51 069 | 48 100 | 46 876 | 49 536 | 49 054 | 44 196 | 38 832 | 40065 | 37046 | 35847 | 34970 |
| Fatalities | 5 712 | 5 444 | 5 243 | 5 583 | 5 437 | 4 572 | 3 907 | 4189 | 3571 | 3357 | 3202 |
| Injuries | 64661 | 61191 | 59123 | 63224 | 62097 | 56046 | 48952 | 49501 | 45792 | 44059 | 42545 |

**Appendix. Table 2. Road crashes and their consequences in Poland, by day of the week.**

| **Day** | Road crashes | | | | **Fatalities** | | | | **Injuries** | | | |
| --- | --- | --- | --- | --- | --- | --- | --- | --- | --- | --- | --- | --- |
| **2004** | | **2014** | | **2004** | | **2014** | | **2004** | | **2014** | |
| total | % | total | % | total | % | total | % | total | % | total | % |
| Monday | 7297 | 14.3 | 5231 | 14.9 | 745 | 13.0 | 451 | 14.0 | 9183 | 14.2 | 6250 | 14.7 |
| Tuesday | 6954 | 13.6 | 5054 | 14.5 | 707 | 12.4 | 428 | 13.4 | 8476 | 13.1 | 5859 | 13.8 |
| Wednesday | 7140 | 14.0 | 5054 | 14.5 | 748 | 13.1 | 407 | 12.8 | 8535 | 13.2 | 5977 | 14.0 |
| Thursday | 7141 | 14.0 | 4914 | 14.0 | 787 | 13.8 | 394 | 12.3 | 8537 | 13.2 | 5946 | 14,0 |
| Friday | 8348 | 16.3 | 5792 | 16.6 | 875 | 15.3 | 504 | 15.8 | 10280 | 15.9 | 6854 | 16.1 |
| Saturday | 7724 | 15.1 | 4843 | 13.8 | 958 | 16.8 | 515 | 16.0 | 10278 | 15.9 | 6235 | 14.7 |
| Sunday | 6465 | 12.7 | 4082 | 11.7 | 892 | 15.6 | 503 | 15.7 | 9372 | 14.5 | 5424 | 12.7 |
| Total | 51069 | 100 | 34970 | 100 | 5712 | 100 | 3202 | 100 | 64661 | 100 | 42545 | 100 |

**Appendix. Table 3. Road crashes and their consequences in Poland, 2004 to 2014, by area of occurrence.**

| **Year** | **Area** | **Road crashes** | **Fatalities** | **Injuries** |
| --- | --- | --- | --- | --- |
| 2004 | Urban | 36694 | 2755 | 44372 |
| Non built-up | 14375 | 2957 | 20289 |
| 2005 | Urban | 34273 | 2495 | 41393 |
| Non built-up | 13827 | 2949 | 19797 |
| 2006 | Urban | 33531 | 2349 | 40506 |
| Non built-up | 13345 | 2894 | 18617 |
| 2007 | Urban | 35200 | 2549 | 42768 |
| Non built-up | 14336 | 3304 | 20456 |
| 2008 | Urban | 34881 | 2499 | 42012 |
| Non built-up | 14173 | 2938 | 20085 |
| 2009 | Urban | 31599 | 2171 | 38277 |
| Non built-up | 12597 | 2401 | 17769 |
| 2010 | Urban | 27836 | 1812 | 33364 |
| Non built-up | 10996 | 2095 | 15588 |
| 2011 | Urban | 29174 | 1961 | 34856 |
| Non built-up | 10891 | 2228 | 14645 |
| 2012 | Urban | 27056 | 1652 | 32071 |
| Non built-up | 9990 | 1919 | 13721 |
| 2013 | Urban | 26078 | 1581 | 30935 |
| Non built-up | 9769 | 1776 | 13124 |
| 2014 | Urban | 25368 | 1466 | 29767 |
| Non built-up | 9602 | 1736 | 12778 |
